# Supplementary material
Source: Springer Nature journal article supplement (https://www.springermedizin.de/resource/supplementary/12990_2010_306_MOESM6_ESM.pdf/9612994)

A

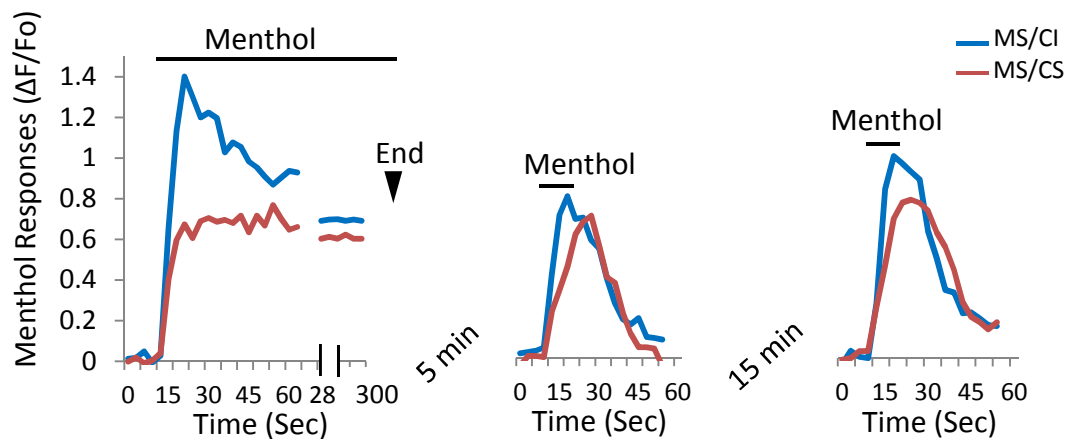

B

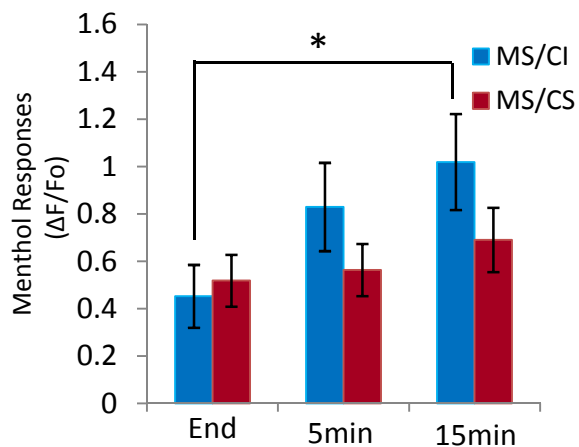

C

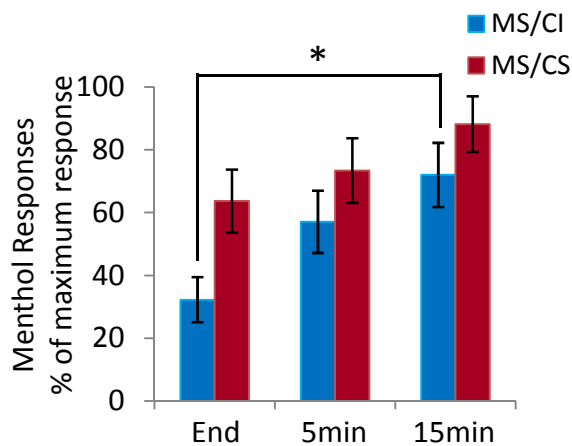

Supplement: MOESM6 [file 9612994]
